# Supplementary material
Source: PubMed Central journal article supplement (PMC2924022)
Supplement: supp_M109.096453_jbc.M109.096453-1.pdf [file supp_M109.096453_jbc.M109.096453-1.pdf]

SUPPLEMENTARY FIGURE

He et al

Supplementary Figure 1

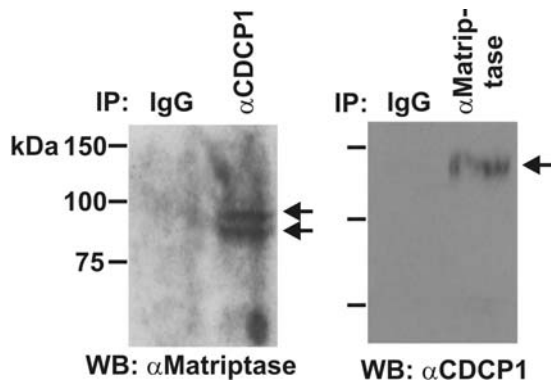

Supplementary Figure 1. **Matriptase and 135 kDa CDCP1 co-immunoprecipitate.**

Left panel, Western blot analysis using a rabbit anti-matriptase antibody of proteins immunoprecipitated from PC3 cell lysates using a goat anti-CDCP1 antibody (Abcam #ab1377). Right panel, Western blot analysis using a goat anti-CDCP1 antibody of proteins immunoprecipitated from PC3 cell lysates using a rabbit anti-matriptase antibody.
